# Supplementary material for: Use of structural equation models to predict dengue illness phenotype
Source: PLoS Negl Trop Dis. 2018 Oct 1;12(10):e0006799. doi: 10.1371/journal.pntd.0006799 (PMC6181434; doi:10.1371/journal.pntd.0006799)
Supplement: S5 Supporting Information — (XLSX) [file pntd.0006799.s005.xlsx]

## Sheet: dataset_PLoS NTD2_excel
age2	sex	dengue	dhf	dhf34	ast_m3	alt_m3	wbc_m3	lymph_m3	albumin_m3	max_hct_m3	platelets_m3	tourn_no_m3	ast_m1	alt_m1	wbc_m1	lymph_m1	albumin_m1	max_hct_m1	platelets_m1	tourn_no_m1
12-13	1	1	1	0	25	10	3600	16	4.5	42.5	271000	21	53	15	2300	32	4.3	43	73000	21
4-5	1	1	0	0	38	14	7200	21	5.6	38	272000	21	36	14	5100	60	4.6	39	263000	21
4-5	2	0	0	0	27	9	9200	13	4.6	37	216000	10	26	11	3800	41	3.7	37	200000	0
8-9	2	1	0	0	167	109	2200	34	4.8	40	227000	21	248	174	1600	39	4.5	40	116000	21
6-7	1	1	0	0	29	13	9500	7	5	38	204000	5	34	14	6500	61	4.9	36	163000	2
4-5	1	0	0	0	39	15	8000	21	5.9	40	287000	8	35	11	7300	45	4.9	37	262000	4
8-9	1	1	0	0	32	10	5200	16	4.6	42.5	266000	21	43	9	2800	24	3.9	41	168000	21
8-9	1	1	0	0	48	23	5000	18	3.9	39	307000	4	43	24	3800	35	3.8	39	147000	20
4-5	2	1	0	0	36	18	2800	37	4	38	206000	6	240	126	600	42	4.4	38	180000	14
6-7	2	1	0	0	35	16	6000	11	4.2	40	273000	4	97	28	3300	32	4.5	45	106000	21
10-11	1	1	1	0	40	17	3700	9	4.7	45	152000	0	82	28	2000	19	4.9	43	101000	16
6-7	1	1	0	0	35	16	5100	5	5.3	41	205000	10	41	17	2700	20	4.5	41	195000	7
6-7	1	1	0	0	29	16	2700	29	4.7	40	132000	21	118	31	5100	27	3.8	38	75000	21
10-11	1	1	1	0	22	9	4500	12	4.5	36	225000	21	34	16	2300	37	4.8	43	250000	21
6-7	2	0	0	0	32	12	8800	17	4.5	35	231000	15	32	14	6900	51	4.4	34	222000	9
6-7	2	0	0	0	20	11	9500	11	5.2	40	231000	1	18	10	6100	53	4.4	36	175000	0
6-7	1	1	0	0	40	22	3800	32	4.1	36	234000	21	51	26	2700	45	4.4	35	201000	21
10-11	2	0	0	0	16	10	12000	11	5.1	38	233000	1	16	12	4800	25	4.7	35	298000	2
12-13	1	1	0	0	37	39	4400	7	5.2	44	205000	21	36	34	2500	62	4.8	41	265000	21
10-11	2	1	0	0	38	44	4600	20	5.7	39	233000	4	108	102	3900	32	4.9	37	138000	10
10-11	1	1	0	0	40	16	3000	25	4.6	40	208000	12	69	31	3300	54	4.7	41	41000	21
8-9	1	1	0	0	37	21	3200	36	5	39	175000	0	38	31	2000	40	4.9	38	272000	21
10-11	1	1	0	0	111	134	4400	14	5	40	176000	0	70	85	2400	45	4.3	38	141000	12
6-7	2	0	0	0	25	17	8500	19	4.6	41.5	273000	10	22	14	9600	45	4.6	39	271000	8
6-7	1	1	0	0	152	86	2600	36	4.5	38	203000	21	252	157	1600	28	4.2	35	73000	21
4-5	2	0	0	0	36	14	9800	4	4.7	42	222000	3	25	9	6900	31	4.5	38	193000	0
4-5	2	0	0	0	35	11	7000	27	4.5	35	288000	6	37	13	4800	28	4.9	37	221000	0
4-5	1	1	0	0	45	10	5600	9	4.3	38	173000	1	81	16	2700	56	4.3	42	123000	8
8-9	2	1	1	0	46	19	3600	6	4.8	34	235000	8	109	25	1900	38	5.5	37	91000	21
6-7	1	1	0	0	56	21	3500	48	4.6	36	325000	10	83	22	2700	33	4.6	37	368000	16
12-13	1	1	0	0	23	15	5500	10	4.6	43.5	128000	12	32	18	4100	33	4.3	44	129000	21
12-13	2	1	1	1	33	17	6300	13	4.9	39	156000	7	239	119	3800	27	5.1	40	46000	12
10-11	1	1	0	0	43	13	4300	17	4.6	38	149000	3	64	20	2600	36	4	37	95000	1
6-7	1	0	0	0	50	19	3100	23	4.5	35	188000	4	38	17	2700	30	4.5	34	179000	10
6-7	2	0	0	0	41	19	7000	24	4.7	37	300000	2	37	13	6700	71	5	35	267000	0
6-7	1	1	0	0	40	21	6100	34	4.4	38	251000	2	58	19	2700	46	4.5	38	159000	4
12-13	1	1	1	0	46	10	8300	7	5.2	41	223000	0	89	19	4300	10	4.8	45	66000	7
12-13	1	1	0	0	40	27	6300	19	4.8	43	194000	0	49	22	2400	77	4.6	48	186000	0
10-11	1	1	0	0	37	28	3500	47	5	42	199000	1	47	22	2700	39	5.5	39	172000	2
8-9	2	0	0	0	28	19	5500	3	4.8	38	216000	3	32	15	3500	43	4.2	37.5	203000	21
4-5	1	1	0	0	39	42	5100	50	4.6	39	206000	0	36	28	3800	53	4.3	40	206000	0
4-5	1	0	0	0	34	16	5600	42	4.8	34	445000	21	33	9	4600	37	4.6	34	427000	3
8-9	2	1	1	1	56	28	9200	3	5.1	39	215000	3	81	23	3700	27	3.7	51	40000	20
12-13	1	1	0	0	60	55	2200	7	4.8	43	228000	10	208	216	3100	25	4.7	45	183000	21
10-11	2	1	1	0	67	64	3100	7	4.4	39	137000	10	115	54	2300	29	4.2	38	65000	21
10-11	2	0	0	0	32	16	10500	12	5	41	172000	14	32	22	9200	7	4.5	40	176000	21
6-7	2	1	0	0	205	53	2300	41	3.4	37	57000	21	289	107	5900	51	3.3	35	105000	21
6-7	1	0	0	0	27	12	4000	41	4.5	34	187000	5	28	14	4100	52	4.1	36	191000	0
6-7	1	1	1	0	42	22	3700	37	4.7	37	254000	21	179	68	2000	23	4.1	36	157000	2
10-11	2	1	0	0	63	40	7500	4	4.9	34	299000	10	48	35	2200	43	4.5	34	223000	21
6-7	2	0	0	0	32	26	6200	5	4.5	37	325000	4	43	40	7800	17	4.5	36	283000	0
10-11	2	0	0	0	35	11	4300	62	4.4	39	221000	0	25	18	5100	62	4.2	41	277000	0
2-3	2	0	0	0	41	18	3600	82	5.4	37.5	195000	21	57	25	2700	75	5.7	36.5	185000	6
8-9	1	0	0	0	20	10	2700	16	5.2	36	90000	7	30	10	3700	83	5.1	39.5	120000	0
10-11	2	0	0	0	35	13	3900	39	4.2	38	107000	1	48	23	4700	62	4.6	37	153000	1
6-7	2	0	0	0	30	9	5200	32	4.4	42	232000	2	37	14	3300	32	4.6	43	243000	7
0-1	2	0	0	0	35	7	8400	49	5.4	37	286000	10	30	16	2400	83	5.2	34	100000	10
4-5	1	0	0	0	38	17	9200	15	4.7	36	174000	3	1422	290	2800	61	5.7	34	156000	7
4-5	2	0	0	0	29	15	9500	51	3.7	35	204000	21	21	12	11900	21	3.9	34	226000	21
12-13	1	1	0	0	73	23	2800	20	4	44	106000	10	419	130	1500	20	3.5	40	38000	21
6-7	1	0	0	0	35	17	7600	31	4.9	38	265000	5	31	14	4800	56	3.9	39	224000	5
10-11	2	1	0	0	39	16	3000	24	4	41	226000	21	157	90	2300	38	4.3	44	144000	21
10-11	1	1	0	0	49	35	7150	18	3.1	40	307100	2	68	34	3800	19	4.4	41	210000	5
12-13	2	0	0	0	56	48	6190	21	4	38	150000	3	49	49	2520	51	4.4	40	132000	5
8-9	1	1	1	0	37	24	2670	66	3.9	40	104800	8	70	39	1600	15	4.1	41	160000	15
4-5	1	1	1	0	79	42	4010	26	4	41	190200	21	249	66	4900	28	3.3	47.5	68000	21
4-5	2	1	0	0	51	31	3100	41	3.7	34	216000	21	70	28	2400	67	3.9	33	219000	21
12-13	2	1	1	0	38	20	4050	25	3.4	43	100000	11	127	70	2900	40	3.6	46	66000	21
8-9	1	1	0	0	47	20	6360	28	3.7	33	153600	4	51	20	2780	44	2.7	34	80000	3
10-11	1	1	0	0	41	21	4410	25	3.8	35	168100	0	49	24	2920	50	3.2	35	150700	5
6-7	1	1	0	0	28	22	7900	5	3.4	33	163000	4	47	16	2370	34	3.8	40	119000	21
10-11	1	1	0	0	34	17	4450	11	4.2	42	200100	21	79	29	2900	54	3.4	45	209000	21
10-11	1	1	0	0	28	11	3710	5	4.4	40	141100	10	36	17	3400	34	4.6	41	173000	21
14-15	2	1	0	0	22	7	1530	50	4.6	40	106000	21	30	10	2000	50	4.1	37	147000	4
6-7	1	1	0	0	31	17	6720	19	4.3	41	265000	21	31	14	3200	29	3.7	36	190000	21
10-11	2	1	1	1	42	15	4970	2	4.6	33	197600	8	98	25	2800	33	4.7	37	140200	21
8-9	1	1	0	0	107	39	2100	15	4.4	27.5	219000	21	404	104	4320	34	3.6	28	74500	0
6-7	2	1	0	0	92	66	3000	26	4.7	37	140000	10	52	35	2290	56	4	36	142600	0
6-7	2	1	0	0	54	24	2300	36	4.5	37.5	110000	3	126	46	2100	48	4.2	37	49000	4
10-11	1	1	0	0	49	22	3800	12	4.1	36	58000	17	296	146	2100	25	4.1	38	120000	21
10-11	2	1	1	1	167	140	2920	31	3.7	39	137300	10	237	474	2060	54	3.5	43	60600	15
10-11	1	1	0	0	37	24	4490	10	4.7	41	179000	10	197	136	2050	35	4.2	43.5	129700	21
12-13	1	1	1	0	49	19	1970	8	4.2	40	140500	7	140	35	1600	45	3.5	43	40000	10
10-11	1	1	0	0	57	27	2260	19	4.5	42	142900	21	171	73	5170	16	4.3	42	61500	21
12-13	1	1	0	0	30	13	3930	45	4.3	40	148100	8	54	25	3930	47	4.5	40	98000	21
8-9	1	0	0	0	37	19	5900	5	4.5	35	246000	5	36	18	4600	73	4.2	41	225000	8
12-13	2	1	0	0	29	13	2630	28	3.8	36	157000	10	116	87	1780	31	3.8	38	140000	21
12-13	2	1	0	0	30	13	4720	42	4.3	38	170000	4	32	16	3540	38	4	37	167000	12
2-3	2	0	0	0	59	39	13900	17	4.4	35	206000	6	55	23	4600	42	3.6	31	187000	5
4-5	1	0	0	0	42	14	7800	49	4	38	363000	10	35	14	7700	56	4	37	207000	8
10-11	1	0	0	0	104	89	6200	5	4.7	44	189000	20	62	77	4900	35	4.7	47	164000	8
4-5	1	0	0	0	65	29	7800	23	4.2	44	358000	13	50	24	5100	30	4.6	39	278000	4
4-5	2	0	0	0	42	25	8900	21	4.5	37	244000	0	36	23	4200	29	4.9	37	290000	0
8-9	2	0	0	0	29	16	7500	20	4.8	39	262000	15	34	16	4500	38	4.8	43	244000	5
8-9	2	1	0	0	26	20	5600	9	5.1	42	197000	1	42	26	2900	13	4.2	33	250000	15
12-13	2	0	0	0	35	18	15800	15	5.2	38	345000	0	22	13	7800	37	4.3	40	321000	0
4-5	2	1	1	1	237	79	4300	29	4.4	32	139000	5	442	157	11300	17	3.5	40	74000	21
2-3	1	1	0	0	158	40	4800	32	4.3	37	380000	8	309	81	4000	59	4.1	36	245000	21
10-11	2	1	1	0	40	17	7500	4	5.2	36	204000	9	70	20	2900	26	4.7	40	125000	10
6-7	2	0	0	0	49	13	8900	32	4.6	43	155000	10	56	21	3600	28	4.2	38	112000	20
4-5	1	0	0	0	49	24	11300	3	5	38	262000	5	44	21	4200	22	5.6	37	222000	5
4-5	1	0	0	0	38	14	10900	35	5.3	40	202000	10	29	13	7100	23	3.8	36	190000	0
8-9	2	0	0	0	25	14	4500	26	4.3	40	176000	8	25	13	3600	28	3.9	45	162000	0
10-11	1	1	1	0	229	290	4600	11	3.9	40	215000	12	138	203	2700	24	3.6	45	102000	21
8-9	2	1	1	1	30	19	5200	20	3.8	39	212000	8	61	16	3200	24	3.5	48	70000	21
2-3	1	0	0	0	44	26	9200	55	4.2	38	117000	0	41	16	11100	29	4.1	36	160000	0
4-5	1	0	0	0	33	13	9300	30	4.2	37.5	260000	6	32	12	4600	41	4.5	35	238000	2
8-9	2	1	0	0	47	20	3400	38	5.2	35	455000	15	69	29	2200	31	4.6	34	350000	21
4-5	2	0	0	0	38	14	5400	31	4.7	37	269000	5	40	15	3000	64	4.1	36	192000	7
8-9	1	1	1	0	44	17	2800	21	4.1	37	216000	11	51	19	4300	22	4.3	35	240000	14
2-3	1	1	0	0	53	25	7800	37	4.6	34	464000	7	46	19	3100	58	3.9	29.5	211000	2
6-7	2	0	0	0	25	17	5600	18	4.1	36	290000	0	26	17	5200	33	4	35	288000	0
12-13	1	0	0	0	19	16	8600	13	4.6	40	333000	7	13	10	9100	18	4.4	38	269000	8
4-5	2	0	0	0	36	14	11800	15	4.5	43	296000	4	43	13	9900	24	4.3	43	255000	10
4-5	2	0	0	0	27	16	15600	25	4.5	35	392000	2	18	11	12000	32	4.1	37	390000	7
8-9	1	1	0	0	105	68	2300	55	4.6	37	344000	10	73	49	1900	60	4.1	32	143000	14
6-7	1	0	0	0	29	12	6300	53	5.3	38	190000	4	43	22	3800	64	3.8	33	18000	8
10-11	1	0	0	0	43	34	16000	7	4.5	40	216000	10	33	23	7100	30	4.2	49	205000	21
14-15	1	1	0	0	23	12	8100	5	4.2	37	228000	20	33	16	4400	28	4	40	278000	21
12-13	1	1	1	0	57	16	5600	15	4.2	41	334000	15	151	42	3300	22	4	47	48000	9
6-7	2	0	0	0	27	19	19500	8	4.5	39	234000	1	30	15	8300	23	2.9	36	201000	2
8-9	2	0	0	0	28	14	7800	21	5.2	40	293000	8	29	15	6100	15	5.1	41	291000	2
4-5	1	0	0	0	43	18	7600	57	5.1	38	391000	6	39	17	4800	55	4.5	38	306000	0
2-3	1	1	1	0	67	26	12400	24	5.1	36	283000	10	72	87	7100	47	4.8	36	159000	7
2-3	2	0	0	0	38	33	9200	19	4.4	39	144000	1	39	16	4700	43	4.6	43	183000	17
4-5	1	0	0	0	39	14	10500	20	4.5	41	361000	3	35	13	9200	33	4.2	40	278000	4
4-5	1	0	0	0	72	44	5700	5	4.9	34	203000	7	36	19	3100	3	4.7	37	154000	4
6-7	1	1	1	0	47	28	5000	38	4.7	37	145000	9	112	46	3700	39	4.1	47	22000	10
10-11	2	1	0	0	26	17	7000	8	5.3	44	388000	5	30	15	2700	41	4.7	43	300000	1
10-11	1	1	1	0	474	165	4900	16	4	51	17000	7	1253	446	9000	17	3.8	34	185000	21
8-9	1	1	1	0	34	27	6100	53	4.6	41	147000	17	71	47	2600	18	4.4	39	107000	20
4-5	1	0	0	0	62	42	9000	48	4.9	33	320000	2	39	17	6600	62	4.9	33	379000	4
6-7	2	1	0	0	50	28	8000	8	6	39	371000	1	58	24	2300	16	4.7	40	158000	8
6-7	1	1	1	0	39	17	3600	23	4.8	40	182000	5	364	199	2400	20	4.4	37.5	120000	10
6-7	1	1	0	0	64	35	2900	36	4.5	33	181000	5	166	122	1700	41	4.2	32	92000	5
8-9	2	1	0	0	35	17	3700	46	4.9	37.5	175000	13	29	17	2100	44	4.3	36	147000	5
10-11	2	1	0	0	38	20	4200	40	5.8	41.5	148000	10	31	18	2000	37	5.2	40	240000	21
8-9	2	0	0	0	19	13	20400	24	4.8	39	360000	0	19	18	14000	27	4.8	39	311000	3
2-3	1	0	0	0	76	21	3900	49	4.8	39	309000	22	67	17	5000	47	5	35	338000	12
4-5	2	1	1	0	65	31	2000	86	5.2	38	11000	12	58	22	2500	65	4.2	37	140000	3
8-9	2	1	0	0	43	17	4000	38	5.3	35	161000	7	61	20	3700	35	5.3	40	85000	10
0-1	1	0	0	0	70	24	10200	73	5	29	408000	1	70	18	7800	57	4.6	25	250000	10
12-13	2	1	1	0	31	18	5400	5	5.4	40	188000	10	60	25	2600	22	4.9	42	140000	15
4-5	1	1	0	0	43	27	5500	12	4.9	39	267000	7	58	33	4200	38	4.9	38	227000	6
6-7	2	1	0	0	39	19	2900	33	4.8	40	221000	8	57	21	1500	53	4.4	37	147000	12
4-5	1	1	1	0	58	31	6800	4	5.3	37	296000	5	74	33	3100	40	4.5	36	202000	8
8-9	2	1	0	0	49	33	4000	26	5.2	43	357000	10	64	30	1900	33	4.5	37	140000	12
6-7	2	1	0	0	85	25	2900	34	3.9	37	116000	3	173	75	2000	44	3.8	32	120000	3
10-11	2	1	0	0	25	19	8500	3	5.8	39	136000	10	30	13	4500	19	5	38	146000	21
2-3	1	1	1	0	54	17	4800	47	5.1	40	276000	12	65	16	5300	53	5.2	36	273000	5
6-7	1	1	1	0	115	37	1900	17	4.9	40	137000	21	227	47	2400	53	3.1	39	80000	21
6-7	1	0	0	0	35	16	10400	21	4.5	40	165000	4	22	12	6900	28	4	39	220000	2
4-5	2	1	1	0	25	15	4000	25	4.7	43	266000	5	113	49	2700	48	4.4	45	129000	3
2-3	1	0	0	0	37	24	5700	42	4.4	38	258000	6	40	14	7500	57	3.9	36	218000	10
2-3	1	0	0	0	17	25	16700	12	4.7	38	352000	0	18	13	12900	23	4.6	35	422000	0
2-3	2	1	1	1	194	87	3000	65	4	40	144000	25	318	167	8600	46	4.1	38	99000	21
10-11	2	1	0	0	29	8	2200	32	4.8	38	164000	0	39	21	1100	22	4.2	36	105000	0
2-3	1	0	0	0	30	24	12600	24	4.7	37	270000	1	35	26	5500	39	4.6	35.5	253000	2
10-11	2	1	0	0	33	12	4000	18	5.9	47	226000	21	30	12	1600	28	4.7	45	131000	21
12-13	1	1	1	0	32	28	4100	21	5	45	140000	15	214	117	1400	44	4.1	43	46000	4
6-7	1	1	0	0	39	22	3300	36	5.4	41	253000	3	62	30	1400	51	4.8	40	76000	10
6-7	1	1	0	0	47	23	5300	16	5	40	197000	5	47	23	2900	45	4.6	39	130000	1
8-9	1	1	1	0	40	19	5300	34	5.1	40	257000	20	71	18	2500	29	4.5	39	146000	10
4-5	1	1	0	0	25	13	6400	5	5	39	294000	0	29	15	3500	26	4.7	40	229000	3
8-9	2	1	0	0	47	20	4200	15	5.4	38	183000	6	69	29	1700	35	4.7	35	123000	3
10-11	1	1	0	0	73	23	4500	16	5.3	40	112000	1	88	38	1700	39	4.8	43	72000	0
6-7	1	1	0	0	43	18	4400	34	4.8	38	247000	2	45	14	3800	56	4.5	37	187000	20
10-11	1	0	0	0	29	16	8000	8	5.4	45	226000	8	18	10	5600	22	4.6	40	226000	6
8-9	1	0	0	0	36	21	9800	2	5.8	40	164000	7	48	24	3100	34	4.8	42	137000	9
10-11	2	1	0	0	22	11	3100	42	5	44	290000	21	29	13	2600	23	4.7	41	184000	21
6-7	2	1	0	0	26	12	13000	3	4.9	40	303000	1	35	11	7400	33	5	39	375000	1
8-9	2	0	0	0	46	31	2600	47	4.6	41	72000	21	51	33	2100	49	4.2	38.5	166000	3
10-11	2	1	1	0	37	17	3400	11	4.9	41.5	242000	5	54	18	1600	41	4.3	44	161000	21
10-11	2	1	0	0	47	27	4300	22	4.3	43.5	122000	21	47	34	2000	55	4.2	45	95000	19
6-7	2	1	0	0	44	15	5000	43	5.2	34	144000	18	58	21	2300	53	4.3	35	144000	21
10-11	1	1	1	0	40	19	5500	5	5.5	42	272000	21	75	26	2300	15	4.5	44	92000	21
10-11	1	1	1	0	53	32	1600	35	4.6	40	158000	15	255	138	1400	31	4.4	38	172000	21
8-9	2	1	0	0	43	18	3100	24	5	39	90000	3	218	71	2800	33	4.3	42	75000	8
8-9	2	1	1	1	51	25	1800	41	4.7	42	61000	5	88	37	5600	30	3	48	20000	21
4-5	2	1	0	0	62	19	4300	52	4.4	44	49000	2	127	47	2900	55	3.9	44	87000	0
8-9	1	1	0	0	34	30	4200	12	5.2	43	204000	8	49	39	2000	38	5.1	42	193000	0
10-11	2	1	1	0	31	18	2700	28	6.1	44	146000	18	32	19	5400	29	4.6	43	92000	21
2-3	2	1	0	0	39	18	3400	44	4.7	38	203000	5	74	32	2500	48	4.4	39	84000	10
2-3	2	1	1	0	53	13	5200	31	5.1	36	221000	15	97	22	2900	56	4.3	33	100000	10
4-5	2	1	0	0	38	19	4500	40	5.1	34	123000	0	65	17	2200	54	4.5	33	58000	21
2-3	2	1	0	0	90	22	3400	29	4.9	45	173000	12	111	43	2600	37	4.4	40	96000	21
10-11	2	1	0	0	43	28	2700	8	4.9	39	218000	0	49	26	1400	37	4.7	38	190000	1
6-7	1	1	0	0	40	10	2900	23	4.7	45	166000	21	43	10	3200	38	4.3	34	142000	5
10-11	2	1	0	0	58	26	5500	35	4.9	34	206000	5	46	34	3400	24	5.5	45	211000	10
6-7	1	1	1	1	24	9	4400	17	4.8	35	262000	20	51	20	3400	65	4.6	36	214000	21
14-15	2	0	0	0	34	19	4600	18	5	37	132000	8	34	24	4300	15	5.4	36	162000	5
10-11	2	1	0	0	37	36	2500	39	4.9	41	183000	21	65	37	1600	35	4.5	40	73000	21
2-3	2	1	1	0	113	25	3900	49	4.9	37	129000	21	171	43	4100	62	4	40	96000	21
6-7	2	1	0	0	39	15	3200	41	4.5	40	191000	0	44	18	2400	35	4.2	37	223000	12
2-3	2	0	0	0	33	14	9500	23	4.5	32.5	343000	2	25	14	8800	34	4.3	33.5	337000	3
10-11	2	1	0	0	91	63	3300	19	4.5	39.5	131000	3	131	74	1600	40	4.2	41.5	78000	1
12-13	1	1	0	0	40	23	4200	6	5	38.5	234000	12	43	25	1800	44	4.3	40	184000	5
8-9	2	0	0	0	32	23	8900	2	4.9	38.5	244000	21	29	21	6300	23	4.6	36	230000	0
8-9	2	0	0	0	16	17	12800	7	4.7	40	320000	0	45	43	13000	18	4.5	38	370000	0
4-5	1	0	0	0	29	17	4500	35	4.7	41	278000	18	29	12	4800	49	4.3	39.5	277000	2
10-11	1	0	0	0	24	15	18300	5	4.7	39	178000	21	39	19	8300	8	4.1	33	183000	21
6-7	1	0	0	0	24	15	14100	18	3.5	34	328000	21	33	19	14500	16	4.3	35	347000	21
6-7	2	0	0	0	33	15	8000	13	4.6	36	234000	3	40	16	5500	17	4.4	32	189000	11
2-3	2	0	0	0	42	16	5700	43	4.4	36	204000	11	44	19	4800	55	4.2	36	87000	11
8-9	2	1	1	0	44	19	1800	27	4.3	38	135000	21	51	24	2200	45	4.1	38	77000	21
4-5	2	0	0	0	43	22	4000	41	4.1	36	170000	2	46	21	6500	16	4.4	40	182000	10
8-9	2	0	0	0	50	32	2200	39	4.9	44	233000	8	56	40	1600	59	4.3	42	274000	21
8-9	2	1	0	0	36	16	4200	38	4.6	36	202000	21	40	18	3200	32	4.5	32	141000	14
4-5	1	0	0	0	24	10	10900	26	4.7	38	139000	0	27	16	4500	43	4.7	37	244000	0
6-7	1	0	0	0	39	18	7100	10	4.3	37	144000	11	36	19	2400	36	4.1	34	171000	11
6-7	1	0	0	0	39	20	6600	30	4.2	39	182000	11	34	16	7000	27	4.3	36	216000	21
4-5	2	1	0	0	51	23	3100	36	4.2	36	179000	10	102	48	2300	40	4	34	86000	6
6-7	2	0	0	0	38	16	4600	41	4.2	40	165000	21	32	17	2600	49	4.2	39	142000	21
4-5	2	1	0	0	27	22	10200	13	4.2	36	235000	2	39	31	7000	12	4.1	34	231000	8
8-9	2	0	0	0	26	19	35800	8	4.6	41	291000	10	21	16	17900	13	4.5	36	265000	2
10-11	1	0	0	0	20	26	7200	4	4.7	47	200000	1	36	35	6800	24	4.3	44	193000	2
6-7	1	0	0	0	32	14	3400	49	4.3	40	177000	8	68	33	3300	53	4.2	38	143000	5
6-7	1	1	0	0	39	19	4600	11	4.1	39	149000	6	44	24	2500	46	4.2	40	125000	8
8-9	2	0	0	0	27	33	11800	7	4.5	38	204000	4	39	23	6100	22	4.3	38	162000	8
8-9	2	0	0	0	40	23	3200	60	4.7	46	216000	3	20	19	3000	44	4.3	40	175000	0
6-7	2	0	0	0	44	29	4100	60	4.5	37	240000	0	65	45	4200	49	4.3	37	191000	5
2-3	2	0	0	0	49	21	5900	49	4.1	38	167000	17	70	32	3500	60	4.2	36	124000	15
2-3	2	0	0	0	25	14	9500	10	4.8	38	236000	4	44	17	6700	22	3.8	42	247000	2
4-5	1	0	0	0	34	18	10800	9	4.8	38	379000	2	43	25	6500	21	4.3	30	311000	0
4-5	1	0	0	0	47	21	5200	37	4.9	37	221000	3	41	16	4000	28	4.6	36.5	215000	0
10-11	1	1	0	0	110	47	5200	29	5	40	150000	10	192	67	1900	29	4	37	102000	0
12-13	2	1	0	0	38	18	2900	14	4.6	36	160000	21	245	109	1600	48	5	36	145000	6
10-11	1	1	0	0	90	81	2600	29	4.6	43	302000	8	167	165	3000	28	4.8	45	193000	21
8-9	2	0	0	0	31	14	2700	61	4.6	38.5	126000	11	45	22	2300	48	4.4	37	129000	5
8-9	1	1	0	0	51	30	1800	28	4.5	38	146000	21	77	44	1200	30	4.6	39	100000	21
12-13	2	0	0	0	41	25	2800	60	4.9	37	244000	2	41	24	3400	58	4.6	38	117000	0
10-11	1	0	0	0	30	19	12100	8	4.9	41	169000	0	30	16	6400	12	4.5	40	193000	11
8-9	1	0	0	0	64	22	5500	31	4.3	38	139000	0	66	31	3400	49	4.4	35	129000	0
6-7	1	0	0	0	77	21	3600	56	4.4	37.5	150000	20	96	36	4400	44	4.6	39	106000	0
4-5	1	0	0	0	54	25	6400	45	3.4	37	155000	0	54	26	4900	56	4.3	38	148000	0
12-13	2	1	0	0	97	42	9050	17	5.3	42	280000	0	185	97	7250	46	5.6	41	180000	0
6-7	1	0	0	0	53	24	7150	33	4.6	42.5	420000	10	59	24	5700	70	4.4	43	240000	1
6-7	1	0	0	0	60	34	10200	16	4.7	38	420000	18	94	60	7600	20	3.9	31	303000	14
8-9	1	1	1	0	31	20	5200	10	4.8	37	239000	0	43	27	3600	37	4.9	41	172000	0
12-13	1	1	1	0	39	26	10300	10	4.8	42	121000	5	84	41	4700	19	4.7	44	246000	21
8-9	2	1	0	0	49	126	3500	18	4.4	40	135000	4	40	76	2900	42	4	39	101000	10
4-5	1	0	0	0	36	25	12500	15	3.2	38	213000	11	49	20	8600	41	4.3	39.5	195000	0
10-11	1	1	1	0	22	9	3400	15	5.2	42	215000	21	85	23	1700	18	4.8	44	108000	21
6-7	1	0	0	0	21	16	4500	39	4.8	38	186000	0	28	16	6400	42	5.2	39	183000	0
12-13	2	1	0	0	25	12	5900	4	4.9	40	151000	21	43	14	3100	21	5	41	121000	21
10-11	2	1	0	0	41	21	13300	3	5.3	40	172000	21	87	36	3600	18	4.8	41	139000	21
14-15	1	1	1	0	33	15	8500	4	5.1	38	240000	21	61	35	2900	49	5.1	42	213000	21
4-5	1	0	0	0	49	22	6800	47	5.1	34	457000	21	39	20	6700	29	4.6	31	367000	21
12-13	2	1	1	0	54	47	1900	35	5.1	41	143000	21	54	42	1300	37	5	42	98000	21
2-3	2	1	0	0	34	10	7900	34	5.1	35	329000	5	48	41	5000	42	6.4	35	331000	12
8-9	1	1	1	0	47	29	1400	53	4.8	42	113000	21	88	42	1700	34	4.6	44	57000	21
6-7	2	0	0	0	39	17	7500	10	5.7	40	233000	2	36	14	3700	54	4.8	42.5	185000	0
14-15	2	1	1	0	27	18	2800	17	4.9	35	269000	2	38	18	2300	27	5.2	34	204000	7
12-13	2	1	0	0	80	45	5000	14	4.8	41	160000	6	69	48	2400	30	4.3	44	123000	9
8-9	1	1	0	0	100	17	5400	10	4.9	39	192000	21	91	29	2500	31	4.1	35	126000	21
8-9	1	0	0	0	41	25	7800	25	4.5	40	205000	21	51	33	7800	25	4.6	42	179000	21
8-9	1	1	0	0	69	24	2200	26	4.6	40	156000	9	180	57	3600	32	4.1	43	70000	21
